# Supplementary material
Source: PubMed Central journal article supplement (PMC373279)
Supplement: nar_32_1_189__1.pdf [file nar_32_1_189__1.pdf]

## Supplementary Figure 1

**A**

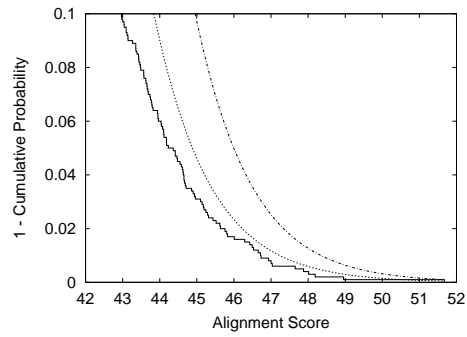

**B**

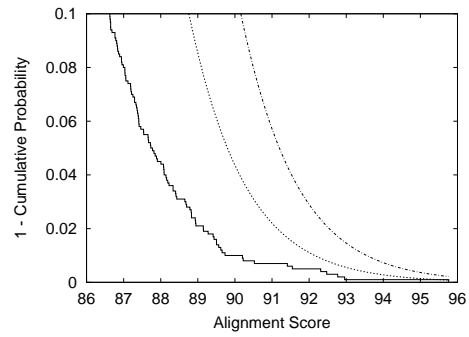

**C**

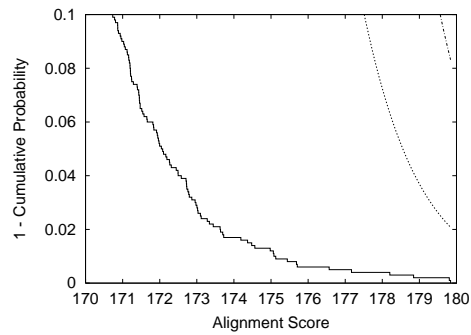

Upper tails of score distributions for random alignments. These plots present an alternative view of the data in Figures 5 A, C, and E. In each panel the solid line indicates the empirical distribution; the dotted line indicates the theoretical distribution with edge correction, and the dot-dash line indicates the theoretical distribution without edge correction. **A** Five sequences. **B** Ten sequences. **C** Twenty sequences.
